# Supplementary material for: Compaction of rolling circle amplification products increases signal integrity and signal-to-noise ratio
Source: PubMed Central journal article supplement (PMC4511876; doi:10.1038/srep12317), 2015-07-23
Supplement: srep12317-s1.pdf [file srep12317-s1.pdf]

# Compaction of rolling circle amplification products increases signal integrity and signal-to-noise ratio

Carl-Magnus Clausson<sup>1\*</sup>, Linda Arngården<sup>1\*</sup>, Omer Ishaq<sup>2</sup>, Axel Klaesson<sup>1</sup>, Malte Kühnemund<sup>1</sup>, Karin Grannas<sup>1</sup>, Björn Koos<sup>1</sup>, Xiaoyan Qian<sup>3</sup>, Petter Ranefall<sup>2</sup>, Tomasz Krzywkowski<sup>3</sup>, Hjalmar Brismar<sup>4</sup>, Mats Nilsson<sup>1,3</sup>, Carolina Wählby<sup>2</sup> & Ola Söderberg<sup>1</sup>

## Supplementary information

**Supplementary Table S1:** Although absolute values of intensity (a) and SNR (b) are affected by changing the disk radii (from 3 pixel inner radius and 7 pixel outer radius to 5 pixel inner radius and 12 pixel outer radius) the outcome of the three replicates, named No1-3 (i.e. compacted RCPs are brighter and have a higher SNR than regular RCPs) is not affected.

**a**

| Replicate  | Average, compacted RCP (a.u.) | SD, compacted RCP (a.u.) | Average, regular RCP (a.u.) | SD, regular RCP (a.u.) | P value (Mann Whitney U) |
|------------|-------------------------------|--------------------------|-----------------------------|------------------------|--------------------------|
| No 1 (3,7) | 21.9                          | 11.8                     | 11.4                        | 6.3                    | p<0.001                  |
| No 1(5,12) | 23.1                          | 11.8                     | 13.3                        | 7.8                    | p<0.001                  |
| No 2(3,7)  | 20.7                          | 11.4                     | 10.5                        | 5.6                    | p<0.001                  |
| No 2(5,12) | 22.3                          | 11.4                     | 13.1                        | 7.7                    | p<0.001                  |
| No 3(3,7)  | 20.2                          | 10.7                     | 11.2                        | 6.2                    | p<0.001                  |
| No 3(5,12) | 23.1                          | 11.8                     | 13.3                        | 7.8                    | p<0.001                  |

**b**

| Replicate  | Average, compacted RCP (dB) | SD, compacted RCP (dB) | Average, regular RCP (dB) | SD, regular RCP (dB) | P value (Mann Whitney U) |
|------------|-----------------------------|------------------------|---------------------------|----------------------|--------------------------|
| No 1 (3,7) | 14.8                        | 1.9                    | 11.2                      | 3.0                  | p<0.001                  |
| No 1(5,12) | 18.0                        | 2.2                    | 12.7                      | 3.9                  | p<0.001                  |
| No 2(3,7)  | 14.6                        | 2.0                    | 10.6                      | 3.0                  | p<0.001                  |
| No 2(5,12) | 17.5                        | 2.7                    | 11.6                      | 3.8                  | p<0.001                  |
| No 3(3,7)  | 14.5                        | 2.0                    | 11.0                      | 3.1                  | p<0.001                  |
| No 3(5,12) | 17.4                        | 2.6                    | 12.5                      | 4.0                  | p<0.001                  |
